# Supplementary material for: Development of an automated Raman system and use of principal component analysis to classify real and counterfeit liquors
Source: Royal Society of Chemistry journal article supplement (doi:10.1039/d3ra06057h), 2023-01-01
Supplement: d3ra06057h1.pdf [file d3ra06057h1.pdf]

## Supplemental information

**Table S1.** The brands and alcohol concentration of commercially available liquor

| Item of alcohol             | Alcohol concentration (%) |
|-----------------------------|---------------------------|
| Tenwey Rice Cooking Wine    | 19.5%                     |
| Red Label Rice Cooking Wine | 22%                       |
| Bacardi Rum                 | 40%                       |
| Beefeater Gin               | 40%                       |
| Bombay Gin                  | 40%                       |
| Absolut Vodka               | 40%                       |
| Agora Kinmen Kaoliang       | 58%                       |

**Table S2.** The Raman shift and molecular vibration of methanol

| <b>Target: Methanol</b>             |                                            |
|-------------------------------------|--------------------------------------------|
| <b>Raman Shift(cm<sup>-1</sup>)</b> | <b>Molecular vibration mode</b>            |
| 1032                                | C-O symmetrical stretching                 |
| 1457                                | CH <sub>3</sub> anti-symmetric deformation |
| 2833                                | C-H symmetric stretching                   |
| 2944                                | C-H asymmetrical stretching                |

**Table S3.** The Raman shift and molecular vibration of ethanol

| <b>Target: Ethanol</b>               |                                                                                                      |
|--------------------------------------|------------------------------------------------------------------------------------------------------|
| <b>Raman Shift(cm<sup>-1</sup>)`</b> | <b>Molecular vibration mode</b>                                                                      |
| 880                                  | C-C-O symmetric stretching                                                                           |
| 1048                                 | C-O stretching                                                                                       |
| 1091                                 | CH <sub>3</sub> rocking                                                                              |
| 1272                                 | CH <sub>2</sub> deformation vibration                                                                |
| 1450                                 | CH <sub>3</sub> anti-symmetric deformation                                                           |
| 2880                                 | Superposition of CH <sub>2</sub> and CH <sub>3</sub> symmetrical stretching and symmetric stretching |
| 2928                                 | CH <sub>2</sub> asymmetrical stretching                                                              |
| 2972                                 | CH <sub>3</sub> asymmetrical stretching                                                              |

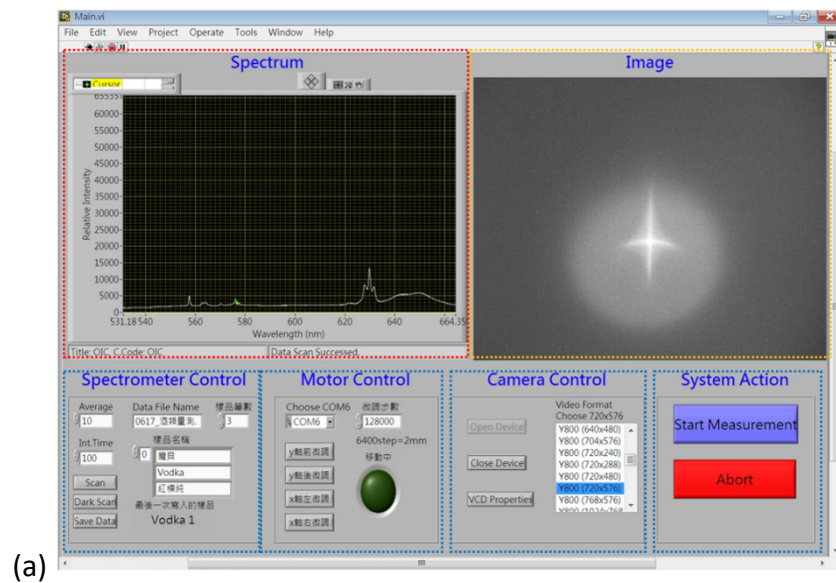

(a)

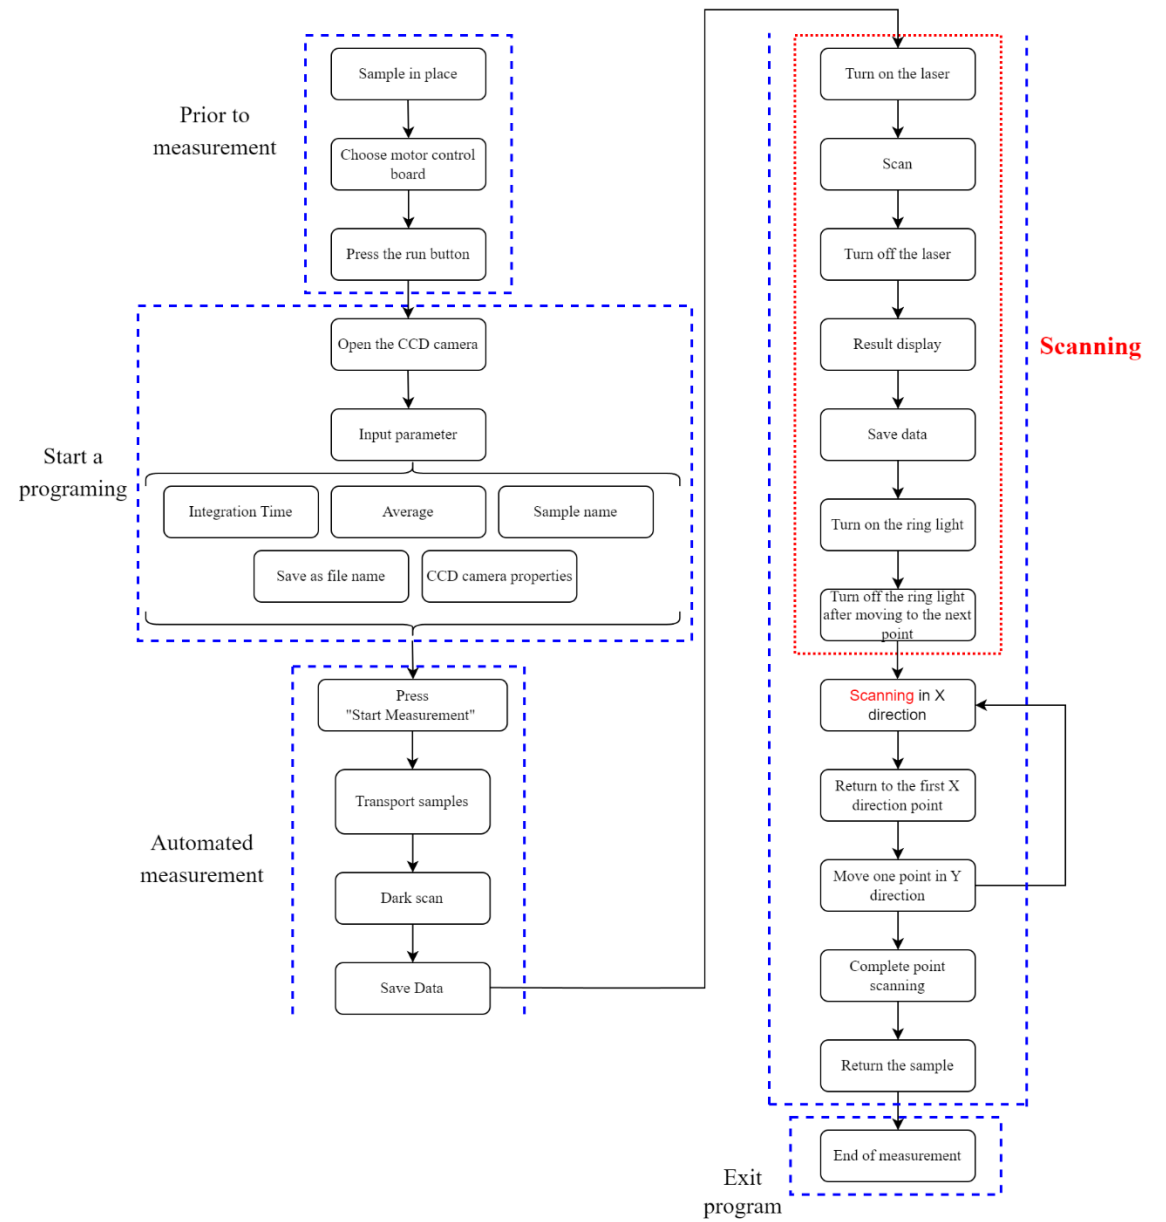

(b)

**Fig. S1** The (a) human-machine interface and the (b) program flow chart

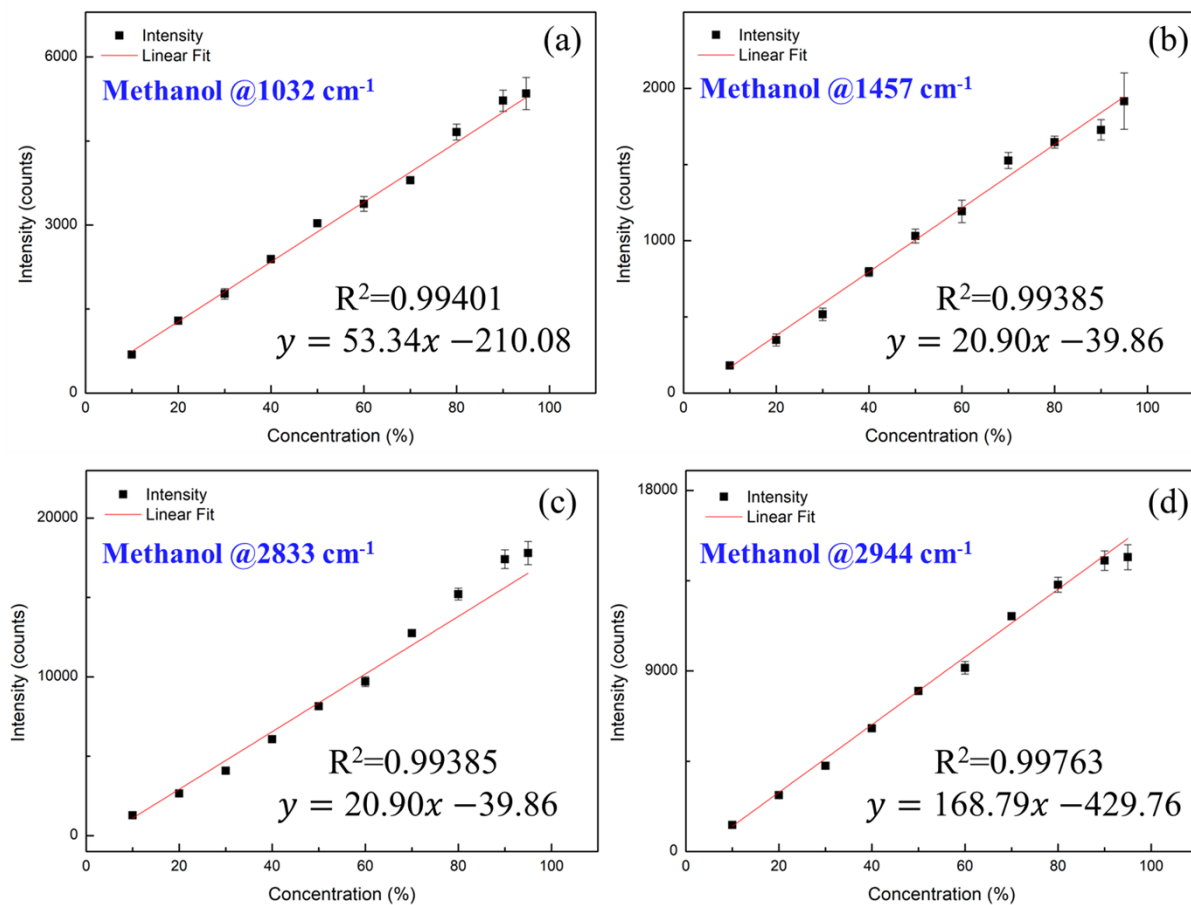

**Fig. S2** Methanol concentration curve by different Raman peaks (a) 1032  $\text{cm}^{-1}$ , (b) 1457  $\text{cm}^{-1}$ , (c) 2833  $\text{cm}^{-1}$ , (d) 2944  $\text{cm}^{-1}$

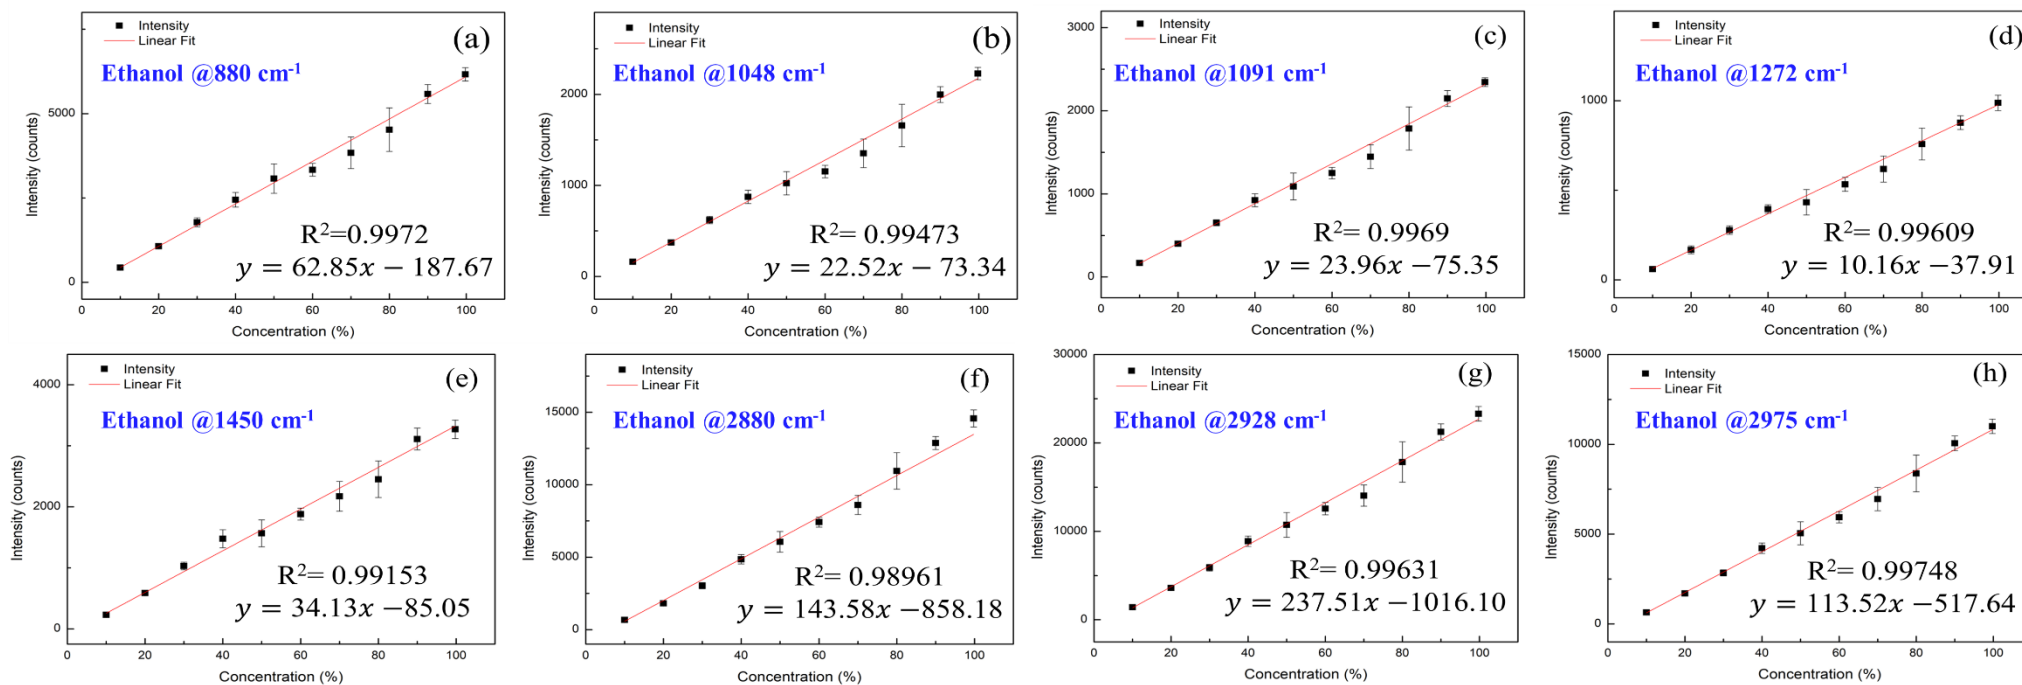

**Fig. S3** Ethanol concentration curve by different Raman peaks (a) 880  $\text{cm}^{-1}$ ; (b) 1048  $\text{cm}^{-1}$ ; (c) 1091  $\text{cm}^{-1}$ ; (d) 1272  $\text{cm}^{-1}$ ;  
(e) 1450  $\text{cm}^{-1}$ ; (f) 2880  $\text{cm}^{-1}$ ; (g) 2928  $\text{cm}^{-1}$ ; (h) 2972  $\text{cm}^{-1}$
